# Supplementary material for: Prediction of Fracture Toughness in the Shale Formation Based on Well Logging and Seismic Data: A Case Study of the Lower Silurian Longmaxi Formation in the Sichuan Basin, China
Source: Hindawi journal article supplement (doi:10.1155/2020/8896352), 2020-11-30
Supplement: f1 [file 8896352.f1.docx]

**Supplementary Data**

Prediction of fracture toughness in the shale formation based on well logging and seismic data: A case study of the Lower Silurian Longmaxi Formation in the Sichuan Basin, China

Kaiyuan Liu1, Jian Xiong2*, Qian Zhang1, Xiao Fan1, Le Li1

1.Geophysical technology research center of BGP INC., China National Petroleum Corporation., Chengdu, 610500, China

2.State Key Laboratory of Oil and Gas Reservoir Geology and Exploitation, Southwest Petroleum University, Chengdu, 610500, China

* Corresponding author: Jian Xiong, E-mail address: [361184163@qq.com](mailto:13880093092@163.com)

**Figures:**


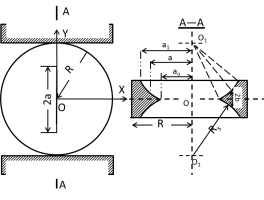


Figure S1. Sample processing pattern of CCNBD


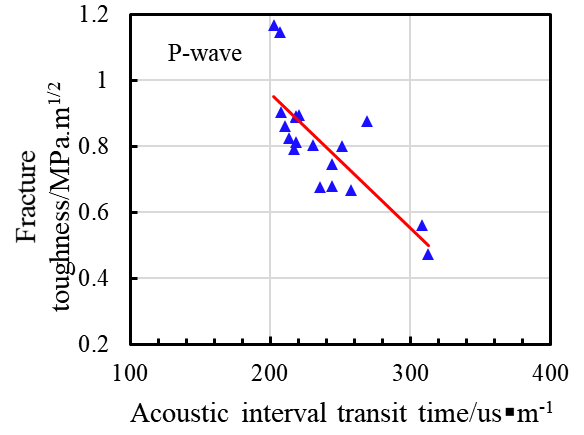

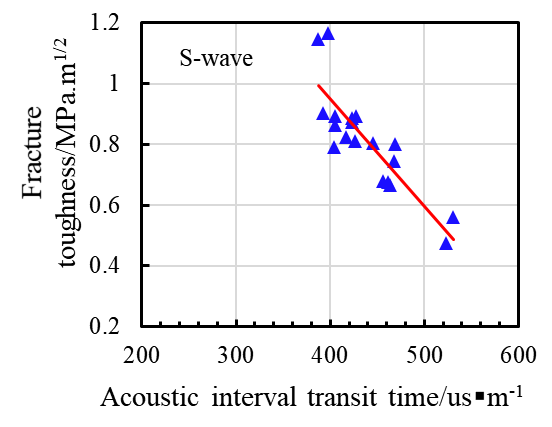


Figure S2 The relationships between the fracture toughness and the acoustic interval transit time(Left is the P-wave, right is the S-wave)


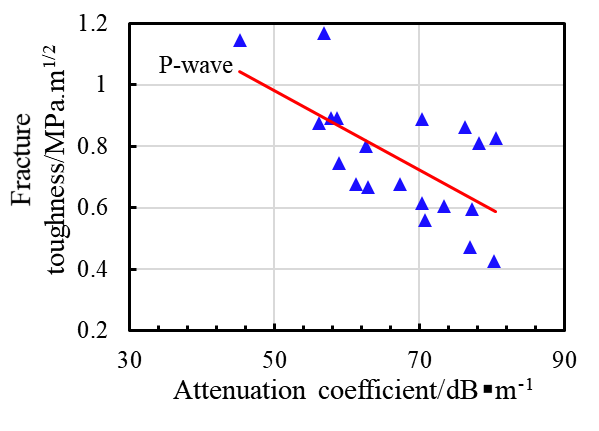

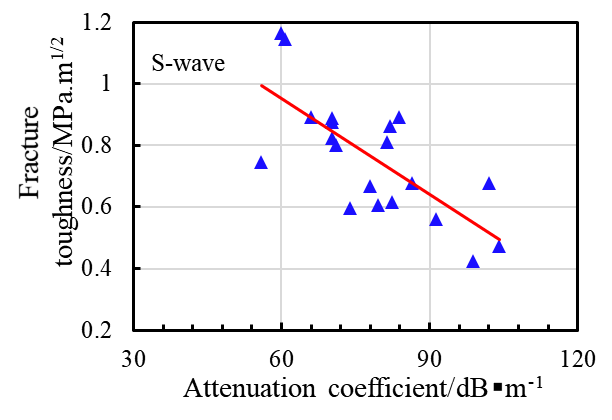


Figure S3 The relationships between the fracture toughness and the attenuation coefficient(Left is the P-wave, right is the S-wave)


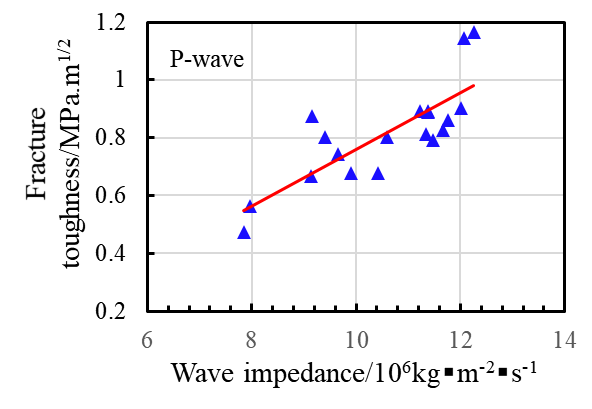

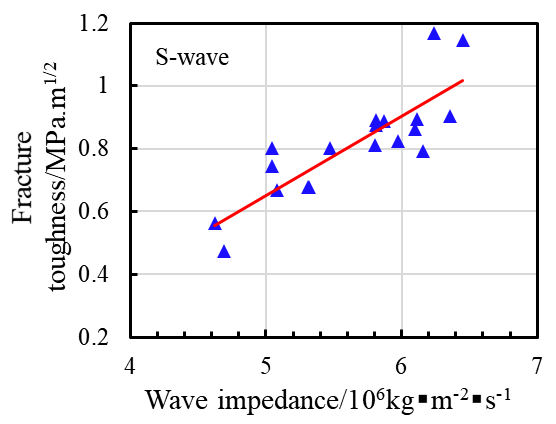


Figure S4 The relationships between the fracture toughness and the wave impedance(Left is the P-wave, right is the S-wave)

**Tables:**

Table S1 Geometric dimensions of CCNBD samples

| No. | Diameter  mm | Thickness  mm | 2a0  mm | 2a1  mm | Density  g/cm3 | P-wave acoustic interval transit time  us▪m-1 | S-wave acoustic interval transit time  us▪m-1 |
| --- | --- | --- | --- | --- | --- | --- | --- |
| 1 | 74.12 | 30.22 | 18.50 | 53.00 | 2.35 | 257.78 | 463.27 |
| 2 | 74.12 | 30.23 | 20.00 | 53.00 | 2.36 | 251.08 | 468.41 |
| 3 | 74.12 | 30.09 | 18.00 | 52.00 | 2.36 | 244.27 | 467.93 |
| 4 | 74.24 | 29.96 | 17.50 | 53.00 | 2.42 | 244.24 | 455.73 |
| 5 | 74.19 | 30.14 | 16.00 | 52.50 | 2.44 | 230.59 | 445.92 |
| 6 | 74.22 | 30.53 | 20.00 | 53.00 | 2.45 | 235.51 | 461.19 |
| 7 | 74.19 | 30.31 | 12.00 | 52.50 | 2.46 | 268.89 | 423.62 |
| 8 | 74.08 | 30.22 | 20.00 | 53.50 | 2.45 | 308.07 | 530.77 |
| 9 | 74.02 | 30.16 | 17.00 | 52.50 | 2.45 | 312.67 | 522.55 |
| 10 | 74.28 | 30.20 | 18.00 | 52.50 | 2.49 | 218.21 | 423.18 |
| 11 | 74.25 | 30.17 | 13.00 | 52.00 | 2.47 | 213.13 | 416.31 |
| 12 | 74.26 | 29.98 | 18.00 | 52.00 | 2.49 | 218.48 | 427.62 |
| 13 | 74.24 | 30.30 | 8.00 | 51.00 | 2.48 | 216.83 | 403.96 |
| 14 | 74.24 | 30.31 | 18.00 | 53.00 | 2.48 | 220.72 | 405.15 |
| 15 | 74.19 | 30.22 | 17.00 | 52.50 | 2.49 | 218.07 | 426.21 |
| 16 | 74.25 | 30.20 | 17.00 | 52.50 | 2.49 | 210.26 | 405.30 |
| 17 | 74.23 | 30.39 | 17.00 | 52.00 | 2.47 | 207.63 | 392.23 |
| 18 | 74.54 | 29.96 | 13.00 | 52.00 | 2.50 | 207.169 | 387.39 |
| 19 | 74.50 | 29.95 | 13.00 | 51.5 | 2.48 | 202.67 | 398.00 |
| 20 | 74.30 | 30.50 | 16.00 | 53.00 | 2.44 | 238.36 | 435.41 |
| 21 | 74.29 | 30.40 | 19.00 | 53.00 | 2.49 | 218.09 | 425.00 |
| 22 | 74.52 | 29.99 | 15.00 | 52.00 | 2.50 | 223.74 | 408.14 |
| 23 | 74.52 | 29.95 | 12.50 | 51.50 | 2.50 | 240.07 | 411.35 |
| 24 | 74.09 | 29.88 | 13.00 | 51.50 | 2.48 | 237.95 | 427.04 |
| 25 | 73.98 | 29.92 | 12.00 | 51.00 | 2.49 | 244.99 | 425.13 |
| 26 | 74.41 | 30.25 | 13.00 | 52.00 | 2.51 | 228.26 | 401.98 |
| 27 | 74.47 | 29.92 | 12.00 | 52.00 | 2.51 | 244.32 | 397.06 |
| 28 | 74.42 | 29.98 | 13.00 | 52.00 | 2.51 | 213.84 | 410.61 |
| 29 | 74.47 | 30.06 | 14.00 | 51.50 | 2.50 | 229.87 | 403.19 |
| 30 | 73.48 | 30.01 | 8.00 | 50.50 | 2.51 | 236.92 | 413.20 |
| 31 | 74.44 | 30.10 | 13.50 | 52.00 | 2.50 | 222.92 | 410.63 |
| 32 | 74.33 | 30.28 | 16.50 | 52.00 | 2.46 | 218.96 | 409.51 |
| 33 | 74.01 | 29.99 | 14.00 | 52.00 | 2.48 | 215.74 | 402.80 |
| 34 | 74.47 | 29.98 | 14.00 | 52.50 | 2.51 | 217.16 | 402.94 |

Note: a0 represents half of initial chevron notched length; a1 represents half of final chevron notched length
